# Supplementary material for: Disentangling the visual cues used by a jumping spider to locate its microhabitat
Source: Oxford University Press journal article supplement (doi:10.1242/jeb.129122), 2016-01-01
Supplement: jeb129122supp.pdf [file jeb129122supp.pdf]

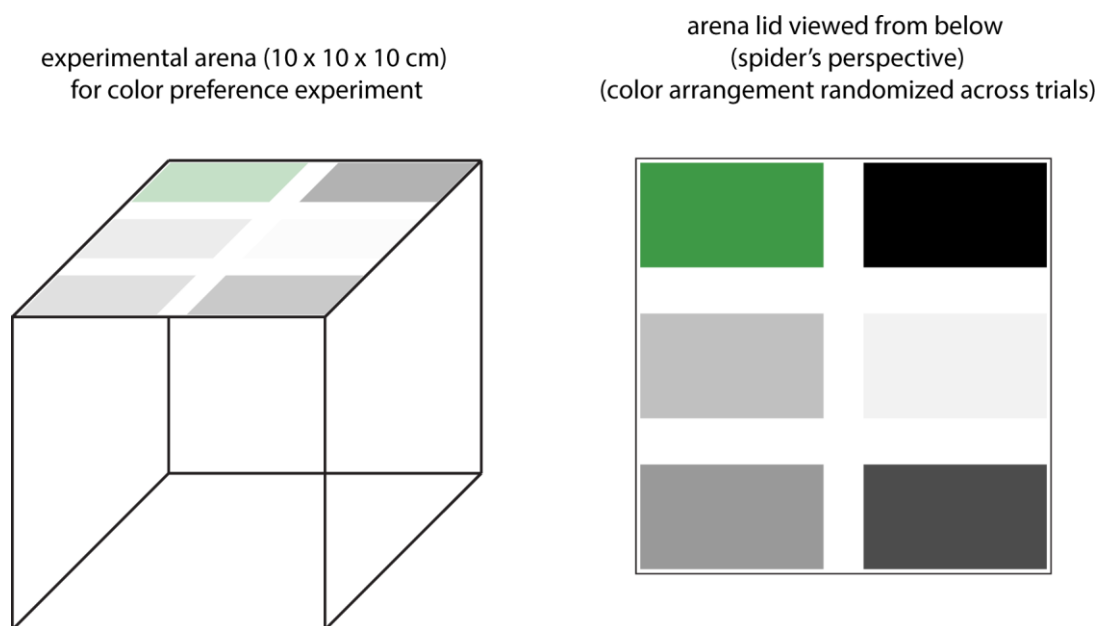

**Fig. S1.** Experimental arena setup for the color preference experiment.

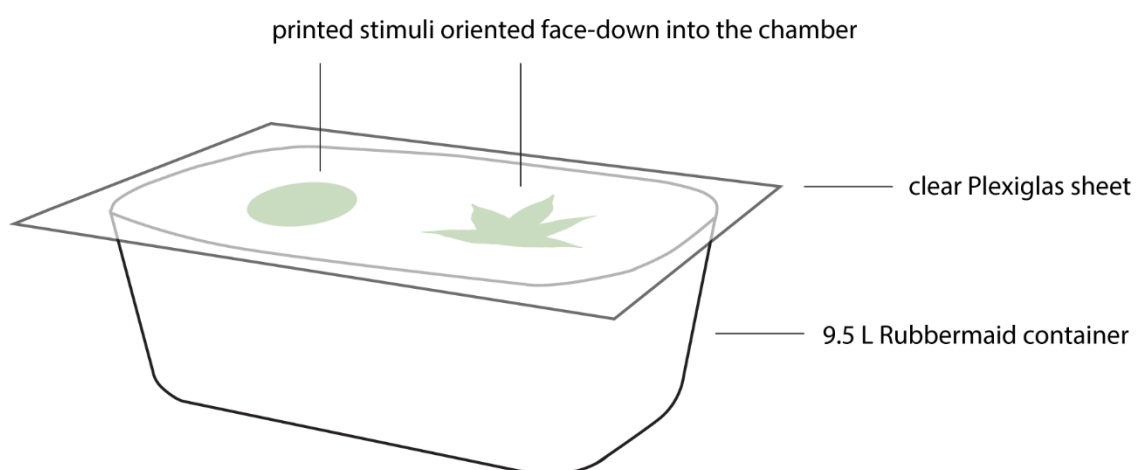

**Fig. S2.** Experimental arena setup for the shape, size, and ambient illumination experiments.

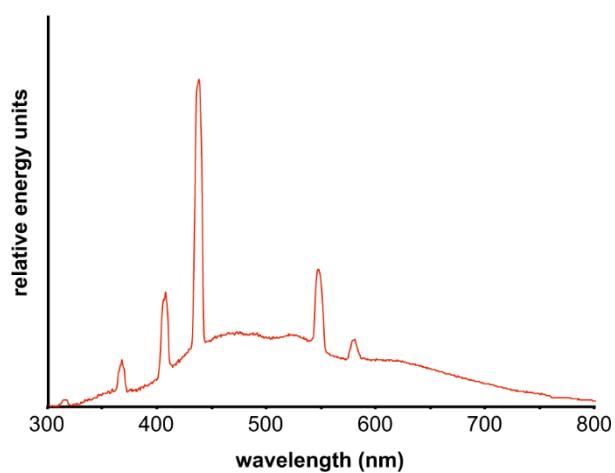

**Fig. S3.** Relative irradiance of Vita-Lite fluorescent tubes used in indoor behavioral experiments.
